# Supplementary material
Source: publisher figshare collection journal article supplement (https://acs.figshare.com/ndownloader/files/5672151)
Supplement: Supplementary file 1 [file 5672151]

## Supporting Information for BI026327P

### Nitric Oxide induced formation of the S<sub>2</sub> state in the oxygen evolving complex of photosystem II from *Synechococcus elongatus*

Josephine Sarrou, Sabina Isgandarova, Jan Kern, Athina Zouni, Gernot Renger, Wolfgang Lubitz and Johannes Messinger

*Extensions to the Kok model to account for a possible direct electron donation of Y<sub>D</sub>-NO to P680<sup>+</sup>*

To simulate the effects of direct Y<sub>D</sub>-NO oxidation by P680<sup>+</sup> on flash-induced oxygen yield patterns, the initial Y<sub>D</sub>-NO population, [Y<sub>D</sub>-NO]<sub>0</sub>, and the miss probability for its oxidation by P680<sup>+</sup>, α<sub>YD-NO</sub>, were introduced as additional free parameters. The miss probability results from the relative rates by which Y<sub>Z</sub> and Y<sub>D</sub>-NO are able to reduce P680<sup>+</sup> after single flash excitation at room temperature and from the Q<sub>A</sub><sup>-</sup> concentration prior to flash excitation. For simplicity it is assumed that α<sub>YD-NO</sub> is S-state independent (see main text). Because in a given PSII center Y<sub>D</sub>-NO can be oxidized only once within a flash train, the absolute Y<sub>D</sub>-NO fraction that is oxidized per flash, γ<sub>YD-NO</sub>(n), declines with flash number, n, during the flash train according to:

$$\gamma_{YD-NO}(n) = (1 - \alpha_{YD-NO}) \cdot [Y_{D-NO}]_{n-1}$$

where [Y<sub>D</sub>-NO]<sub>n-1</sub> = [Y<sub>D</sub>-NO]<sub>n-2</sub> - γ<sub>YD-NO</sub>(n-1) is the fraction of Y<sub>D</sub>-NO present in PSII before the n-th flash. It is furthermore assumed that in the fraction of centers (1 - γ<sub>YD-NO</sub>(n)) in which the OEC is oxidized the miss and double hit probabilities are the same as in the control. Since the oxidation of Y<sub>D</sub>-NO leads to a miss for the OEC, the now flash number dependent miss parameter can be calculated to be:

$$\alpha(n) = \alpha (1 - \gamma_{YD-NO}(n)) + \gamma_{YD-NO}(n).$$

Similarly it follows that the double hit, β, and single hit, γ, probabilities of the OEC are:

$$\beta(n) = \beta (1 - \gamma_{YD-NO}(n))$$

$$\gamma(n) = (1 - \alpha - \beta) (1 - \gamma_{YD-NO}(n)).$$

*Extensions to the Kok model to account for possible reductions of the S<sub>2</sub> and S<sub>3</sub> states by Y<sub>D</sub>-NO during the flash train*

Fast reductions of the S<sub>2</sub> and S<sub>3</sub> states by Y<sub>D</sub>-NO were implemented into the extended Kok model described in Materials and Methods by splitting the initial S-state populations into a fraction A, where the nitroso tyrosine had been formed, and a fraction B = 1-A, in which back reactions do not take place during the flash train. Once the Y<sub>D</sub>-NO centers of fraction A reach the S<sub>2</sub> or S<sub>3</sub> state they were allowed to convert from fraction A into fraction B according to:

$$d[S_2(A)]/dt = - k_{21} \cdot [ S_2(A)]$$

$$d[S_3(A)]/dt = - k_{32} \cdot [ S_3(A)]$$

$$d[S_1(B)]/dt = k_{21} \cdot [ S_2(A)]$$

$$d[S_2(B)]/dt = k_{32} \cdot [ S_3(A)].$$
